# Supplementary material for: Chelation and stabilization of berkelium in oxidation state +IV
Source: Springer Nature journal article supplement (doi:10.1038/nchem.2759), 2017-04-10
Supplement: 41557_2017_BFnchem2759_MOESM1_ESM.mol [file 41557_2017_BFnchem2759_MOESM1_ESM.mol]

nchem.2759_comp1.mol
  ChemDraw03231709592D

 54 57  0  0  0  0  0  0  0  0999 V2000
   -0.5628   -1.3234    0.0000 N   0  0  0  0  0  0  0  0  0  0  0  0
   -0.5673   -0.6637    0.0000 C   0  0  0  0  0  0  0  0  0  0  0  0
    0.0022   -0.3298    0.0000 C   0  0  0  0  0  0  0  0  0  0  0  0
   -0.0022    0.3298    0.0000 C   0  0  0  0  0  0  0  0  0  0  0  0
    0.5673    0.6637    0.0000 C   0  0  0  0  0  0  0  0  0  0  0  0
    0.5631    1.3239    0.0000 N   0  0  0  0  0  0  0  0  0  0  0  0
   -0.0107    1.6501    0.0000 C   0  0  0  0  0  0  0  0  0  0  0  0
    1.1323    1.6573    0.0000 C   0  0  0  0  0  0  0  0  0  0  0  0
    0.0110   -1.6496    0.0000 C   0  0  0  0  0  0  0  0  0  0  0  0
   -1.1323   -1.6573    0.0000 C   0  0  0  0  0  0  0  0  0  0  0  0
    1.7060    1.3310    0.0000 C   0  0  0  0  0  0  0  0  0  0  0  0
    2.2755    1.6649    0.0000 C   0  0  0  0  0  0  0  0  0  0  0  0
    2.8492    1.3386    0.0000 N   0  0  0  0  0  0  0  0  0  0  0  0
   -1.7060   -1.3310    0.0000 C   0  0  0  0  0  0  0  0  0  0  0  0
   -2.2755   -1.6649    0.0000 C   0  0  0  0  0  0  0  0  0  0  0  0
   -2.8492   -1.3386    0.0000 N   0  0  0  0  0  0  0  0  0  0  0  0
    0.0152   -2.3098    0.0000 O   0  0  0  0  0  0  0  0  0  0  0  0
   -0.0152    2.3098    0.0000 O   0  0  0  0  0  0  0  0  0  0  0  0
    3.4184    1.6720    0.0000 C   0  0  0  0  0  0  0  0  0  0  0  0
    3.4140    2.3317    0.0000 O   0  0  0  0  0  0  0  0  0  0  0  0
   -3.4179   -1.6723    0.0000 C   0  0  0  0  0  0  0  0  0  0  0  0
   -3.9917   -1.3460    0.0000 C   0  0  0  0  0  0  0  0  0  0  0  0
   -3.4142   -2.3322    0.0000 O   0  0  0  0  0  0  0  0  0  0  0  0
   -0.5802    1.3162    0.0000 C   0  0  0  0  0  0  0  0  0  0  0  0
    0.5802   -1.3162    0.0000 C   0  0  0  0  0  0  0  0  0  0  0  0
   -1.1539    1.6425    0.0000 N   0  0  0  0  0  0  0  0  0  0  0  0
   -1.7229    1.3083    0.0000 C   0  0  0  0  0  0  0  0  0  0  0  0
   -1.7189    0.6490    0.0000 C   0  0  0  0  0  0  0  0  0  0  0  0
   -1.1452    0.3227    0.0000 C   0  0  0  0  0  0  0  0  0  0  0  0
   -0.5760    0.6561    0.0000 C   0  0  0  0  0  0  0  0  0  0  0  0
    1.1539   -1.6425    0.0000 N   0  0  0  0  0  0  0  0  0  0  0  0
    1.7234   -1.3086    0.0000 C   0  0  0  0  0  0  0  0  0  0  0  0
    1.7189   -0.6490    0.0000 C   0  0  0  0  0  0  0  0  0  0  0  0
    1.1452   -0.3227    0.0000 C   0  0  0  0  0  0  0  0  0  0  0  0
    0.5760   -0.6561    0.0000 C   0  0  0  0  0  0  0  0  0  0  0  0
   -1.1576    2.3024    0.0000 O   0  0  0  0  0  0  0  0  0  0  0  0
   -2.2966    1.6346    0.0000 O   0  0  0  0  0  0  0  0  0  0  0  0
    1.1584   -2.3022    0.0000 O   0  0  0  0  0  0  0  0  0  0  0  0
    2.2966   -1.6346    0.0000 O   0  0  0  0  0  0  0  0  0  0  0  0
    3.9917    1.3460    0.0000 C   0  0  0  0  0  0  0  0  0  0  0  0
   -3.9962   -0.6864    0.0000 C   0  0  0  0  0  0  0  0  0  0  0  0
   -4.5699   -0.3601    0.0000 C   0  0  0  0  0  0  0  0  0  0  0  0
   -5.1391   -0.6935    0.0000 C   0  0  0  0  0  0  0  0  0  0  0  0
   -5.1349   -1.3537    0.0000 C   0  0  0  0  0  0  0  0  0  0  0  0
   -4.5612   -1.6799    0.0000 N   0  0  0  0  0  0  0  0  0  0  0  0
    3.9962    0.6864    0.0000 C   0  0  0  0  0  0  0  0  0  0  0  0
    4.5699    0.3601    0.0000 C   0  0  0  0  0  0  0  0  0  0  0  0
    5.1391    0.6935    0.0000 C   0  0  0  0  0  0  0  0  0  0  0  0
    5.1346    1.3532    0.0000 C   0  0  0  0  0  0  0  0  0  0  0  0
    4.5609    1.6794    0.0000 N   0  0  0  0  0  0  0  0  0  0  0  0
    4.5567    2.3396    0.0000 O   0  0  0  0  0  0  0  0  0  0  0  0
    5.7041    1.6871    0.0000 O   0  0  0  0  0  0  0  0  0  0  0  0
   -4.5567   -2.3396    0.0000 O   0  0  0  0  0  0  0  0  0  0  0  0
   -5.7041   -1.6871    0.0000 O   0  0  0  0  0  0  0  0  0  0  0  0
  1  2  1  0      
  2  3  1  0      
  3  4  1  0      
  4  5  1  0      
  5  6  1  0      
  6  7  1  0      
  6  8  1  0      
  1  9  1  0      
  1 10  1  0      
  8 11  1  0      
 11 12  1  0      
 12 13  1  0      
 10 14  1  0      
 14 15  1  0      
 15 16  1  0      
  9 17  2  0      
  7 18  2  0      
 13 19  1  0      
 19 20  2  0      
 16 21  1  0      
 21 22  1  0      
 21 23  2  0      
  7 24  1  0      
  9 25  1  0      
 24 26  1  0      
 26 27  1  0      
 27 28  1  0      
 28 29  2  0      
 29 30  1  0      
 30 24  2  0      
 25 31  1  0      
 31 32  1  0      
 32 33  1  0      
 33 34  2  0      
 34 35  1  0      
 35 25  2  0      
 26 36  1  0      
 27 37  2  0      
 31 38  1  0      
 32 39  2  0      
 19 40  1  0      
 22 41  2  0      
 41 42  1  0      
 42 43  2  0      
 43 44  1  0      
 44 45  1  0      
 45 22  1  0      
 40 46  2  0      
 46 47  1  0      
 47 48  2  0      
 48 49  1  0      
 49 50  1  0      
 50 40  1  0      
 50 51  1  0      
 49 52  2  0      
 45 53  1  0      
 44 54  2  0      
M  END
